# Supplementary material for: Calcium Chloride in Neonatal Parenteral Nutrition Solutions with and without Added Cysteine: Compatibility Studies Using Laser and Micro-Flow Imaging Methodology
Source: PLoS One. 2015 Aug 28;10(8):e0136894. doi: 10.1371/journal.pone.0136894 (PMC4552580; doi:10.1371/journal.pone.0136894)
Supplement: S2 File — (XLS) [file pone.0136894.s002.xls]

## Sheet: No Cysteine-pH
Sample	Visual		pH		No Cysteine--Study 2		Phos mmol/L
	initial	after 24 hr	initial	after 24 hr	Zetasizer	Ca
					Size (nm)	mmol/L
M1	o	o	5.78	5.61	297	0	0
N1	o	o	5.74	5.59	145	0	0
O1	o	o	5.51	5.4	152	0	0
P1	o	o	5.61	5.55	514	0	0
Q1	o	o	5.8	5.74	384	0	0
M2	o	o	5.87	5.69	321	0	0.75
N2	o	o	5.85	5.69	103	0	0.75
O2	o	o	5.75	5.63	551	0	0.75
P2	o	o	5.73	5.65	674	0	0.75
Q2	o	o	5.85	5.73	778	0	0.75
M3	o	o	5.9	5.73	28	0	1
N3	o	o	5.9	5.73	19	0	1
O3	o	o	5.78	5.666	857	0	1
P3	o	o	5.75	5.69	841	0	1
Q3	o	o	5.84	5.69	286	0	1
M4	o	o	5.71	5.67	233	40	0
N4	o	o	5.69	5.54	75	40	0
O4	o	o	5.61	5.53	458	40	0
P4	o	o	5.57	5.5	1016	40	0
Q4	o	o	5.71	5.6	494	40	0
M5	o	o	5.83	5.66	15	40	0.75
N5	o	o	5.81	5.65	699	40	0.75
O5	o	o	5.73	5.64	2139	40	0.75
P5	o	o	5.67	5.85	1377	40	0.75
Q5	o	o	5.84	5.78	168	40	0.75
M6	o	o	5.85	5.7	15	40	1
N6	o	o	5.85	5.69	91	40	1
O6	o	o	5.7	5.65	1551	40	1
P6	o	o	5.76	5.62	1023	40	1
Q6	o	X	5.86	5.74	877	40	1

## Sheet: No Cysteine-Counts
Sample	No Cysteine--Study 2 (count/mL)							Phos mmol/L
	MFI	MFI	MFI	Micro	Micro	Micro	Ca
	> 5 micons	> 10 microns	> 25 microns	>2 microns	> 10 microns	> 25 microns	mmol/L
M1	36	2	0	66	6	1	0	0
N1	32	2	0	18	1	0	0	0
O1	238	13	0	18	3	1	0	0
P1	2516	2	0	7	1	0	0	0
Q1	527	18	0	11	3	1	0	0
M2	48	1	0	30	6	0	0	0.75
N2	6	1	0	6	2	0	0	0.75
O2	67	4	0	7	0	0	0	0.75
P2	3027	3	0	10	2	0	0	0.75
Q2	121	13	1	3	1	0	0	0.75
M3	71	4	0	32	12	2	0	1
N3	30	0	0	5	1	0	0	1
O3	164	3	0	6	0	0	0	1
P3	3039	0	0	9	4	3	0	1
Q3	243	17	2	7	2	1	0	1
M4	33	0	0	41	6	1	40	0
N4	14	0	0	16	1	0	40	0
O4	135	3	0	11	1	0	40	0
P4	1485	0	0	9	1	0	40	0
Q4	94	5	0	7	2	1	40	0
M5	78	6	0	18	3	1	40	0.75
N5	27	3	0	14	1	0	40	0.75
O5	376	23	0	13	3	1	40	0.75
P5	5282	7	0	10	3	0	40	0.75
Q5	98	12	0	4	0	0	40	0.75
M6	34	3	1	18	3	2	40	1
N6	13	1	0	20	1	0	40	1
O6	508	7	0	9	1	0	40	1
P6	5251	12	0	23	4	0	40	1
Q6	303	31	1	4	0	0	40	1

## Sheet: Cysteine-pH
Sample	Visual		pH		Cysteine 50 mg/dL--Study 2
	initial	after 24 hr	initial	after 24 hr	Zetasizer	Ca	P
					Size (nm)	mmol/L	mmol/L
M7	o	o	5.52	5.34	547	0	0
N7	o	o	5.5	5.34	353	0	0
O7	o	o	5.39	5.33	460	0	0
P7	o	o	5.38	5.29	128	0	0
Q7	X	X	5.59	5.5	323	0	0
M8	o	o	5.64	5.45	751	0	0.75
N8	o	o	5.63	5.44	408	0	0.75
O8	o	o	5.46	5.38	389	0	0.75
P8	o	o	5.47	5.39	278	0	0.75
Q8	o	o	5.7	5.65	305	0	0.75
M9	o	o	5.68	5.49	534	0	1
N9	o	o	5.65	5.47	568	0	1
O9	o	o	5.52	5.41	330	0	1
P9	o	o	5.53	5.38	72	0	1
Q9	o	o	5.7	5.63	95	0	1
M10	o	o	5.48	5.3	1215	40	0
N10	o	o	5.47	5.29	963	40	0
O10	o	o	5.31	5.26	432	40	0
P10	o	o	5.38	5.25	227	40	0
Q10	o	o	5.54	5.43	368	40	0
M11	o	o	5.59	5.41	745	40	0.75
N11	o	o	5.85	5.41	910	40	0.75
O11	o	o	5.44	5.36	694	40	0.75
P11	o	o	5.46	5.38	247	40	0.75
Q11	o	o	5.61	5.49	500	40	0.75
M12	o	o	5.64	4.43	1165	40	1
N12	o	o	5.6	5.43	960	40	1
O12	o	o	5.41	5.32	369	40	1
P12	o	o	5.52	5.44	206	40	1
Q12	o	o	5.67	5.6	344	40	1

## Sheet: Cysteine-Counts
Sample		Cysteine 50 mg/dL--Study 2 (Count/mL)
	MFI	MFI	MFI	Micro	Micro	Micro	Ca	P
	> 5 micons	> 10 microns	> 25 microns	>2 microns	> 10 microns	> 25 microns	mmol/L	mmol/L
M7	6	1	0	24	2	0	0	0
N7	36	0	0	11	2	0	0	0
O7	352	4	0	11	0	0	0	0
P7	1917	1	0	14	2	2	0	0
Q7	193	19	0	3	0	0	0	0
M8	17	1	0	11	0	0	0	0.75
N8	15	1	0	18	3	1	0	0.75
O8	1314	1	0	6	0	0	0	0.75
P8	15	0	0	7	1	1	0	0.75
Q8	81	6	0	8	0	0	0	0.75
M9	13	1	0	9	1	0	0	1
N9	11	0	0	18	2	0	0	1
O9	2239	3	0	9	1	1	0	1
P9	24	2	1	8	1	1	0	1
Q9	140	13	0	25	3	1	0	1
M10	4	0	0	17	2	1	40	0
N10	68	1	0	14	3	1	40	0
O10	2401	3	0	9	1	0	40	0
P10	16	3	1	10	3	0	40	0
Q10	44	2	0	15	2	1	40	0
M11	70	8	0	24	4	0	40	0.75
N11	1937	0	0	10	1	1	40	0.75
O11	2425	4	0	11	0	0	40	0.75
P11	12	1	0	7	3	2	40	0.75
Q11	133	3	0	38	7	3	40	0.75
M12	32	1	0	17	1	0	40	1
N12	2407	3	0	13	2	0	40	1
O12	2449	1	0	4	0	0	40	1
P12	18	2	1	6	0	0	40	1
Q12	25	6	0	38	2	0	40	1
